# Supplementary material
Source: publisher figshare collection journal article supplement (https://acs.figshare.com/ndownloader/files/16776008)
Supplement: Supplementary file 1 [file 16776008]

## Supporting Information

### Influence of phase separation and spinodal decomposition on microstructure of $\text{Mg}_2\text{Si}_{1-x}\text{Sn}_x$ alloys

Andrey Sizov<sup>1</sup>, Hazel Reardon<sup>2</sup>, Bo B. Iversen<sup>2</sup>, Paul Erhart<sup>3</sup>, Anders E.C. Palmqvist<sup>1</sup>

<sup>1</sup> Department of Chemistry and Chemical Engineering, Chalmers University of Technology, SE-412 96 Gothenburg, Sweden

<sup>2</sup> Department of Chemistry, Aarhus University, 8000 Aarhus C, Denmark

<sup>3</sup> Department of Physics, Chalmers University of Technology, SE-412 96 Gothenburg, Sweden

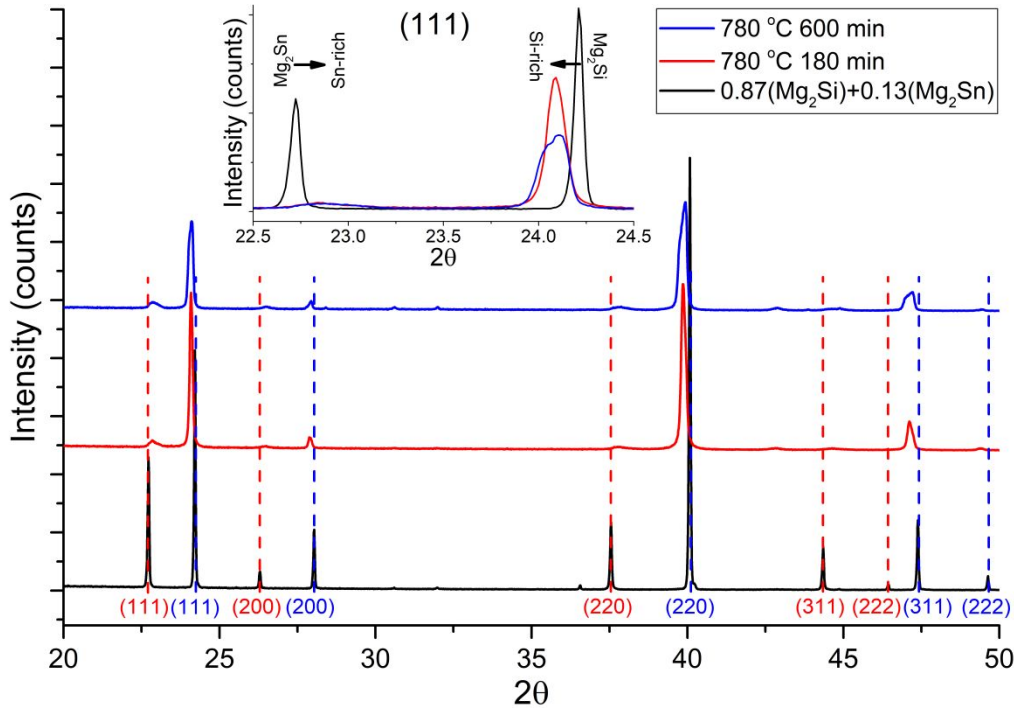

**FIG. S1. Homogenization of  $\text{Mg}_2\text{Si}_{0.87}\text{Sn}_{0.13}$  at 780 °C (red and blue vertical dashed lines represent positions of the reflections of pure  $\text{Mg}_2\text{Sn}$  and  $\text{Mg}_2\text{Si}$ , respectively).**

To determine the time needed to homogenize the mixtures at 780 °C, the initial mixture (black pattern) of  $\text{Mg}_2\text{Si}$  and  $\text{Mg}_2\text{Sn}$  in stoichiometric amounts (to form  $\text{Mg}_2\text{Si}_{0.87}\text{Sn}_{0.13}$ ) was sintered at 700 °C for 10 min in SPS and brought to 780 °C for homogenization. After dwelling for 180 and 600 min (red and blue patterns, respectively), the samples were quickly cooled in SPS ( $\sim 140$  K/min). From the shift in reflection positions indicated by the arrows in the magnification of the reflection (111), the unit cell of  $\text{Mg}_2\text{Si}$  becomes larger, while the  $\text{Mg}_2\text{Sn}$  unit cell becomes smaller. This indicates that the initial mixture was treated in the single-phase region at 780 °C. Rietveld refinement shows that the Si-rich phase greatly dominates over the Sn-rich phase in both samples. The Sn-rich phase does not decrease with dwelling, which provides evidence to suggest that homogenization is accomplished after 3h.

Both samples have wide Si- and Sn-rich reflections, which represents strained structures. The sample treated for 600 min decomposed spinodally, since the peaks of the Si-rich phase split into two sets of peaks, which indicates the formation of two Si-rich phases with similar compositions. A stronger pinning effect due to a smaller size of grains could explain the absence of the peak split in the sample treated for 180 min. A minor amount of the Sn-rich phase in both samples, most likely, is also formed according to the mechanism of spinodal decomposition. Further demixing of the samples was suppressed due to quick cooling.

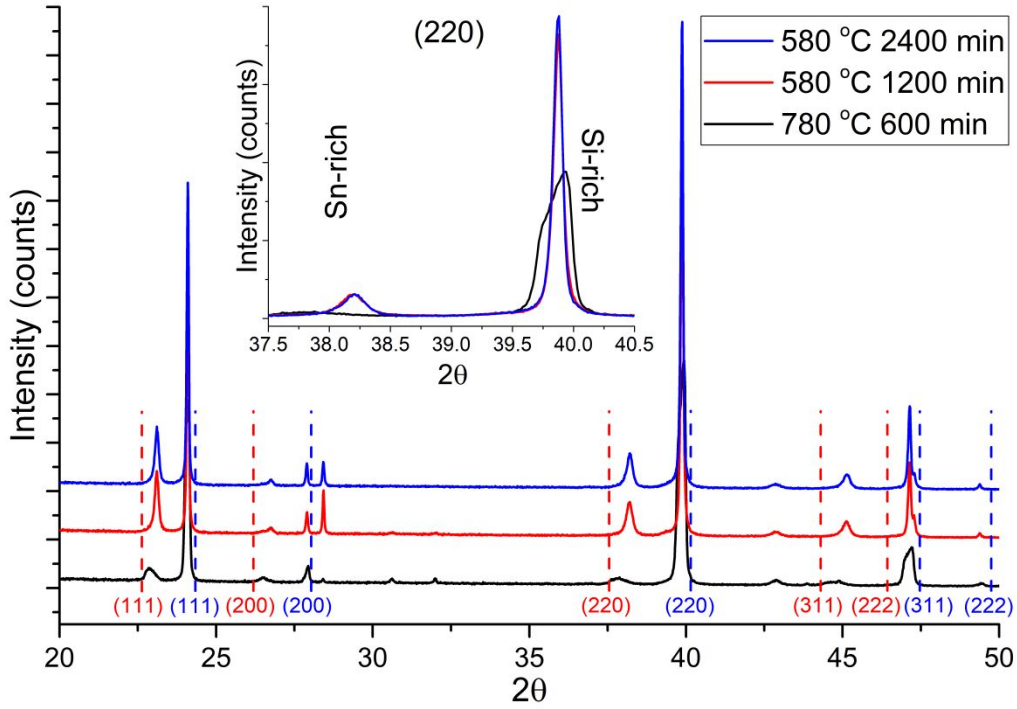

**FIG. S2. Phase separation in  $\text{Mg}_2\text{Si}_{0.87}\text{Sn}_{0.13}$  at 580 °C (red and blue vertical dashed lines represent positions of the reflections of pure  $\text{Mg}_2\text{Sn}$  and  $\text{Mg}_2\text{Si}$ , respectively).**

The sample, which was treated in SPS at 780 °C for 600 min and quickly cooled (black pattern), was also treated in the tube furnace at 780 °C for 600 min (to ensure homogenization) and then annealed at 580 °C for 1200 and 2400 min, respectively (red and blue patterns, respectively). Since compositions and amounts of the formed phases are the same in both cases, we conclude that the sample achieved thermodynamic equilibrium after 1200 min at 580 °C.

**Table S1. Extended summary of results from Rietveld refinement of  $\text{Mg}_2\text{Si}_{1-x}\text{Sn}_x$  alloys treated at 680 °C. <sup>a)</sup>The second Si-rich phase of sample  $\text{Mg}_2\text{Si}_{0.92}\text{Sn}_{0.08}$  was not possible to refine.**

| Nominal composition                           | Phases composition                                            | Phase amount, mol% | Lattice parameter, Å | Overall Sn amount, at% | $R_{\text{wp}}$ | Zero error |
|-----------------------------------------------|---------------------------------------------------------------|--------------------|----------------------|------------------------|-----------------|------------|
| $\text{Mg}_2\text{Si}_{0.97}\text{Sn}_{0.03}$ | $\text{Mg}_2\text{Si}_{0.987}\text{Sn}_{0.013}$               | 29.6               | 6.360697             | 4.1                    | 8.6             | 0.00013    |
|                                               | $\text{Mg}_2\text{Si}_{0.944}\text{Sn}_{0.056}$               | 66.0               | 6.378280             |                        |                 |            |
|                                               | Si                                                            | 4.4                |                      |                        |                 |            |
| $\text{Mg}_2\text{Si}_{0.94}\text{Sn}_{0.06}$ | $\text{Mg}_2\text{Si}_{0.977}\text{Sn}_{0.023}$               | 11.2               | 6.364752             | 6.5                    | 9.8             | -0.05692   |
|                                               | $\text{Mg}_2\text{Si}_{0.926}\text{Sn}_{0.074}$               | 84.9               | 6.385404             |                        |                 |            |
|                                               | Si                                                            | 3.9                |                      |                        |                 |            |
| $\text{Mg}_2\text{Si}_{0.92}\text{Sn}_{0.08}$ | <sup>a)</sup> $\text{Mg}_2\text{Si}_{0.911}\text{Sn}_{0.089}$ | 93.1               | 6.391747             | 8.5                    | 9.3             | -0.08385   |
| $\text{Mg}_2\text{Si}_{0.87}\text{Sn}_{0.13}$ | Si                                                            | 6.9                |                      | 16.4                   | 10.0            | 0.04697    |
|                                               | $\text{Mg}_2\text{Si}_{0.888}\text{Sn}_{0.112}$               | 87.0               | 6.401046             |                        |                 |            |
|                                               | $\text{Mg}_2\text{Si}_{0.150}\text{Sn}_{0.850}$               | 6.9                | 6.703796             |                        |                 |            |
|                                               | Si                                                            | 5.2                |                      |                        |                 |            |
| $\text{Mg}_2\text{Si}_{0.82}\text{Sn}_{0.18}$ | Sn                                                            | 0.8                |                      | 19.4                   | 9.1             | -0.00778   |
|                                               | $\text{Mg}_2\text{Si}_{0.880}\text{Sn}_{0.120}$               | 80.7               | 6.404433             |                        |                 |            |
|                                               | $\text{Mg}_2\text{Si}_{0.095}\text{Sn}_{0.905}$               | 8.8                | 6.726414             |                        |                 |            |
|                                               | $\text{Mg}_2\text{Si}_{0.227}\text{Sn}_{0.763}$               | 0.8                | 6.668349             |                        |                 |            |
|                                               | Si                                                            | 8.5                |                      |                        |                 |            |
|                                               | Sn                                                            | 1.1                |                      |                        |                 |            |

**Table S2. Extended summary of results from Rietveld refinement of  $\text{Mg}_2\text{Si}_{1-x}\text{Sn}_x$  alloys treated at 580 °C.**

| Nominal composition                           | Phase composition                               | Phase amount, mol% | Lattice parameter, Å | Overall Sn amount, at% | $R_{\text{wp}}$ | Zero error |
|-----------------------------------------------|-------------------------------------------------|--------------------|----------------------|------------------------|-----------------|------------|
| $\text{Mg}_2\text{Si}_{0.97}\text{Sn}_{0.03}$ | $\text{Mg}_2\text{Si}_{0.988}\text{Sn}_{0.012}$ | 41.8               | 6.360071             | 3.5                    | 10.4            | -0.05108   |
|                                               | $\text{Mg}_2\text{Si}_{0.958}\text{Sn}_{0.062}$ | 48.9               | 6.380694             |                        |                 |            |
|                                               | Si                                              | 9.2                |                      |                        |                 |            |
| $\text{Mg}_2\text{Si}_{0.94}\text{Sn}_{0.06}$ | $\text{Mg}_2\text{Si}_{0.975}\text{Sn}_{0.025}$ | 8.7                | 6.365322             | 6.6                    | 9.3             | -0.04698   |
|                                               | $\text{Mg}_2\text{Si}_{0.927}\text{Sn}_{0.073}$ | 87.6               | 6.385321             |                        |                 |            |
|                                               | Si                                              | 3.7                |                      |                        |                 |            |
| $\text{Mg}_2\text{Si}_{0.92}\text{Sn}_{0.08}$ | $\text{Mg}_2\text{Si}_{0.917}\text{Sn}_{0.083}$ | 93.2               | 6.389428             | 8.6                    | 9.4             | -0.01282   |
|                                               | $\text{Mg}_2\text{Si}_{0.331}\text{Sn}_{0.669}$ | 0.8                | 6.629579             |                        |                 |            |
|                                               | $\text{Mg}_2\text{Si}_{0.169}\text{Sn}_{0.831}$ | 0.4                | 6.695948             |                        |                 |            |
|                                               | Si                                              | 5.6                |                      |                        |                 |            |
| $\text{Mg}_2\text{Si}_{0.87}\text{Sn}_{0.13}$ | $\text{Mg}_2\text{Si}_{0.922}\text{Sn}_{0.078}$ | 85.0               | 6.387167             | 13.1                   | 10.0            | -0.04698   |
|                                               | $\text{Mg}_2\text{Si}_{0.328}\text{Sn}_{0.672}$ | 9.1                | 6.630702             |                        |                 |            |
|                                               | $\text{Mg}_2\text{Si}_{0.110}\text{Sn}_{0.890}$ | 0.4                | 6.720196             |                        |                 |            |
|                                               | Si                                              | 5.5                |                      |                        |                 |            |
| $\text{Mg}_2\text{Si}_{0.82}\text{Sn}_{0.18}$ | $\text{Mg}_2\text{Si}_{0.901}\text{Sn}_{0.099}$ | 81.4               | 6.396000             | 18.2                   | 9.8             | -0.01415   |
|                                               | $\text{Mg}_2\text{Si}_{0.331}\text{Sn}_{0.669}$ | 14.9               | 6.629608             |                        |                 |            |
|                                               | $\text{Mg}_2\text{Si}_{0.108}\text{Sn}_{0.892}$ | 0.2                | 6.720899             |                        |                 |            |
|                                               | Si                                              | 3.6                |                      |                        |                 |            |
